# Supplementary material for: Molecular Decay of the Tooth Gene Enamelin (ENAM) Mirrors the Loss of Enamel in the Fossil Record of Placental Mammals
Source: PLoS Genet. 2009 Sep 4;5(9):e1000634. doi: 10.1371/journal.pgen.1000634 (PMC2728479; doi:10.1371/journal.pgen.1000634)

## Manis insertion (2688-2697)

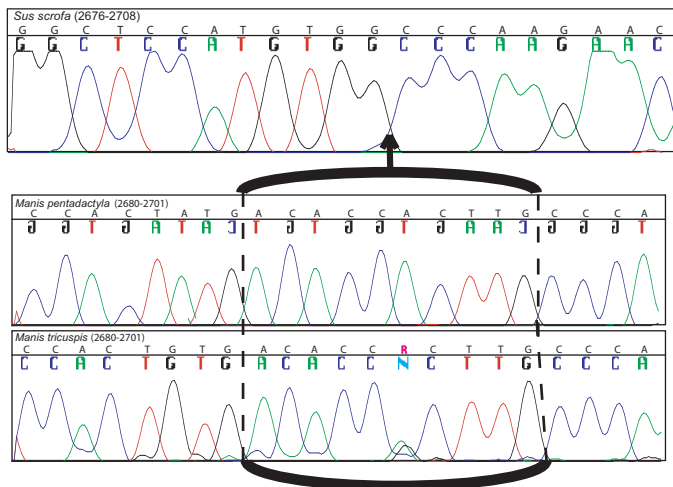

## Orycteropus insertion (2649)

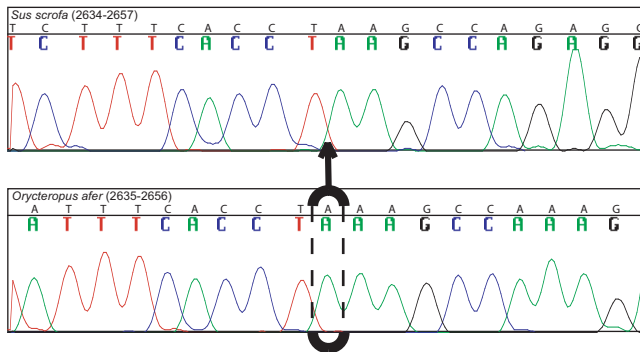

## Vermilingua deletion (2837-2841)

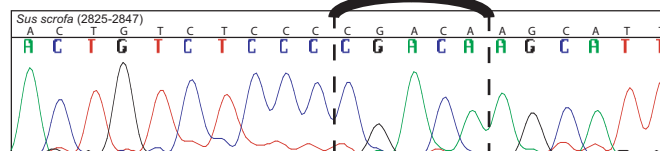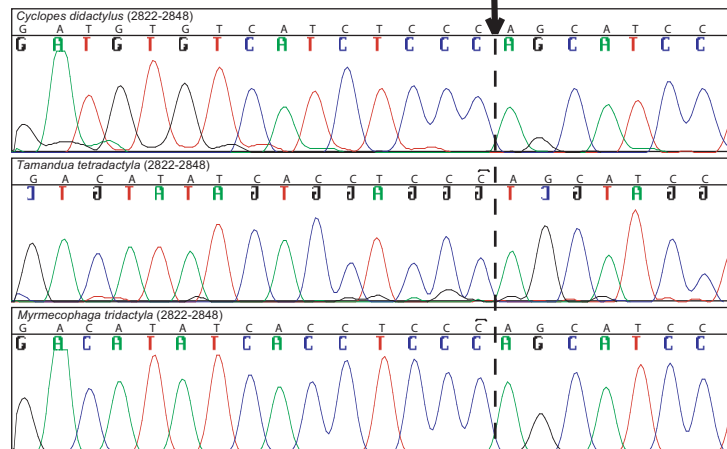

## Pilosa deletion (2503)

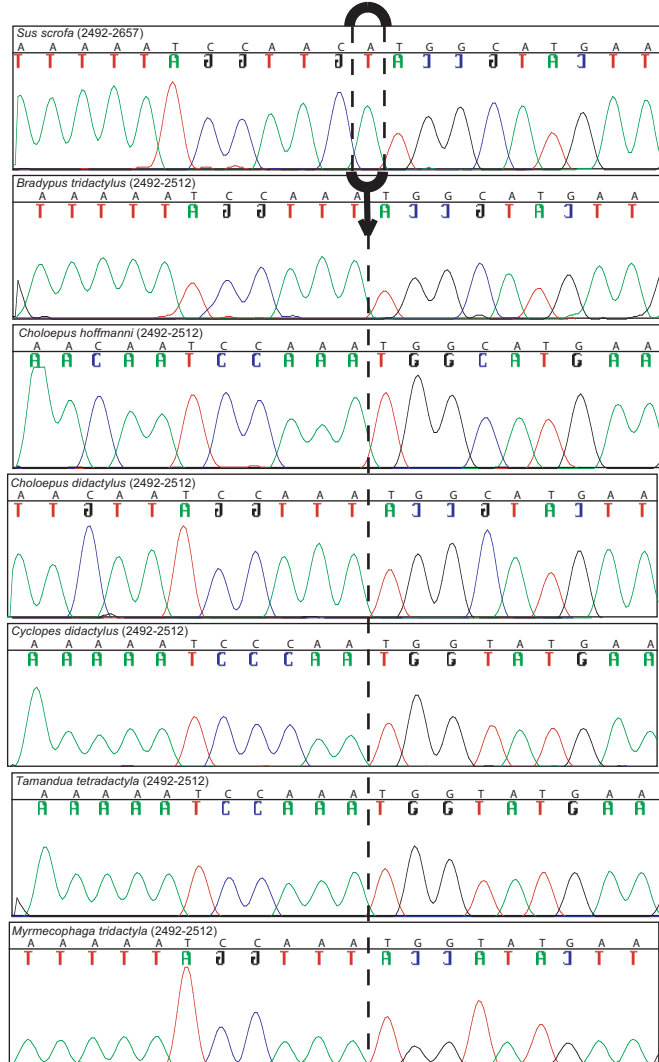

## Folivora deletion (1587-1588)

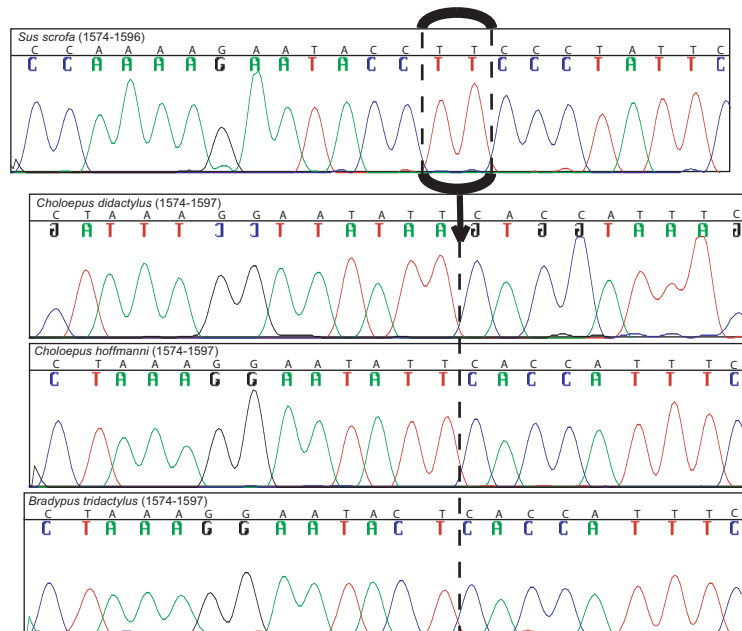

*Euphractus* + *Chaetophractus* insertion (800-801)

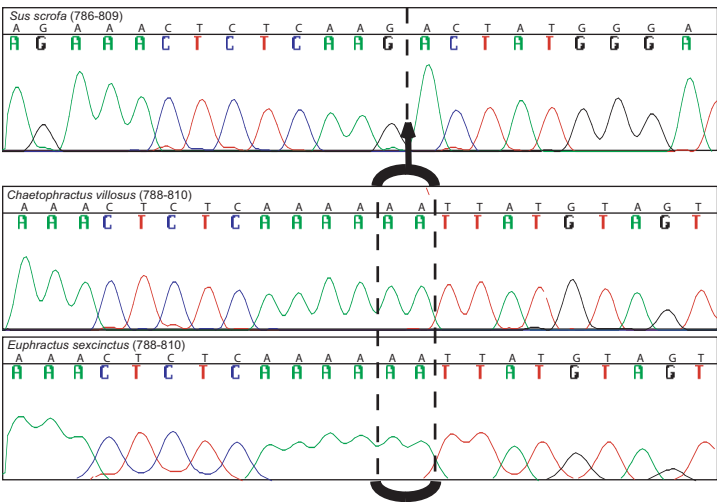

*Caperea* and *Eschrichtius* deletion (1243)

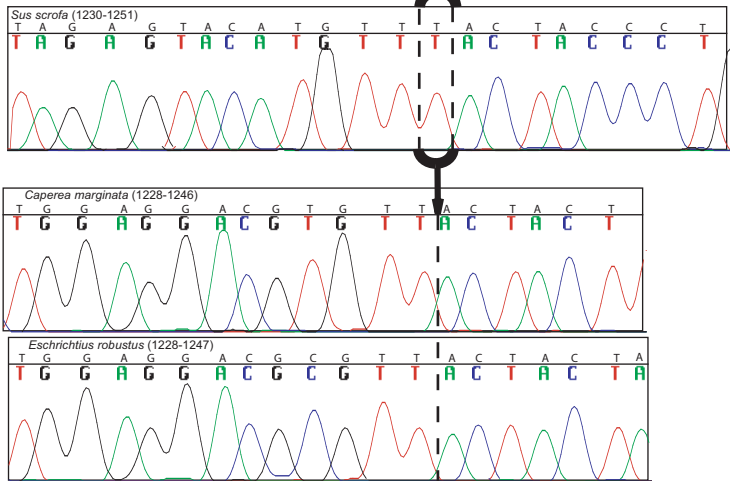

*Dasypus* insertion (4020)

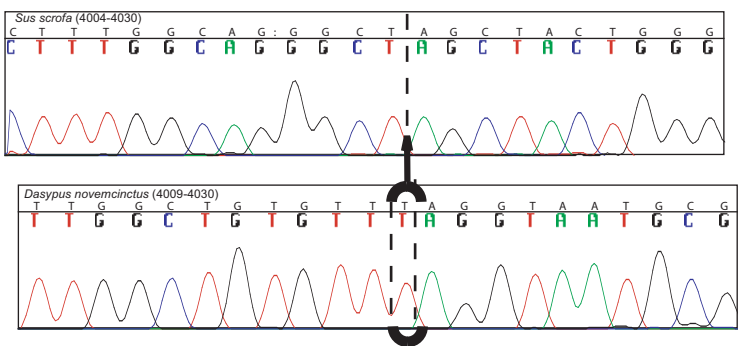

*Kogia* deletion (4034-4035)

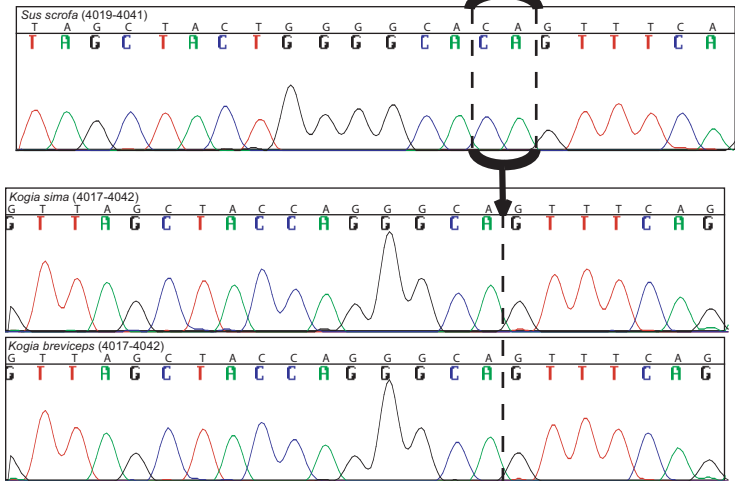

Supplement: Figure S5 — Representative chromatograms showing frameshift insertions and deletions in edentulous and enamelless taxa. (0.29 MB PDF) [file pgen.1000634.s007.pdf]
